# Supplementary material
Source: PubMed Central journal article supplement (PMC7882079)
Supplement: NIHMS1659415-supplement-supplement.pdf [file NIHMS1659415-supplement-supplement.pdf]

1 **Supplementary Information**

2

3 **Additional gene mutations may refine the 2017 European LeukemiaNet**

4 **classification in adult patients with de novo acute myeloid leukemia**

5 **aged <60 years**

6

7 Ann-Kathrin Eisfeld,<sup>1</sup> Jessica Kohlschmidt,<sup>2,3</sup> Alice Mims,<sup>1</sup> Deedra Nicolet,<sup>2,3</sup>

8 Christopher J. Walker,<sup>2</sup> James S. Blachly,<sup>1,2</sup> Andrew J. Carroll,<sup>4</sup>

9 Dimitrios Papaioannou,<sup>1</sup> Jonathan E. Kolitz<sup>5</sup>, Bayard E. Powell<sup>6</sup>, Richard M. Stone,<sup>7</sup>

10 Albert de la Chapelle,<sup>2</sup> John C. Byrd,<sup>1,2</sup> Krzysztof Mrózek,<sup>2</sup> and Clara D. Bloomfield<sup>2</sup>

11

12 1. Division of Hematology, Department of Internal Medicine, The Ohio State University

13 Comprehensive Cancer Center, Columbus, OH, USA

14 2. The Ohio State University Comprehensive Cancer Center, Columbus, OH, USA

15 3. Alliance Statistics and Data Center, Mayo Clinic, Rochester, MN, USA

16 4. University of Alabama at Birmingham, Birmingham, AL, USA

17 5. Monter Cancer Center, Zucker School of Medicine at Hofstra/Northwell, Lake Success,

18 NY, USA

19 6. Wake Forest Baptist Comprehensive Cancer Center, Winston-Salem, NC, USA

20 7. Dana-Farber/Partners CancerCare, Boston, MA, USA

21

22 Running title: Mutations refining the 2017 ELN classification of AML

23

24

25 **PARTICIPATING INSTITUTIONS**

26

27 The following Cancer and Leukemia Group B (CALGB)/Alliance for Clinical Trials in Oncology  
28 (Alliance) institutions participated in this study and contributed at least five patients. For each of  
29 these institutions, the current or last principal investigator and the cytogeneticists who analyzed  
30 the cases are listed as follows:

31

32 The Ohio State University Medical Center, Columbus, OH: Claire F. Verschraegen, Karl S. Theil,  
33 Diane Minka and Nyla A. Heerema; North Shore University Hospital, Manhasset, NY: Jonathan  
34 E. Kolitz, Prasad R. K. Koduru, Ayala Aviram-Goldring and Chandrika Sreekantaiah; Wake Forest  
35 University School of Medicine, Winston-Salem, NC: Heidi D. Klepin, P. Nagesh Rao, Wendy L.  
36 Flejter and Mark Pettenati; Dana Farber Cancer Institute, Boston, MA: Harold J. Burstein, Ramana  
37 V. Tantravahi, Cynthia C. Morton and Paola Dal Cin; Washington University School of Medicine,  
38 St. Louis, MO: Nancy L. Bartlett, Michael S. Watson, Eric C. Crawford, Jaime Garcia-Heras,  
39 Peining Li and Shashikant Kulkarni; University of North Carolina, Chapel Hill, NC: Matthew I.  
40 Milowsky and Kathleen W. Rao; University of Maryland Greenebaum Cancer Center, Baltimore,  
41 MD: Heather D. Manuel, Joseph R. Testa, Maimon M. Cohen, Judith Stamberg and Yi Ning;  
42 University of Chicago Medical Center, Chicago, IL: Hedy L. Kindler, Diane Roulston, Katrin M.  
43 Carlson, Yanming Zhang and Michelle M. LeBeau; Roswell Park Cancer Institute, Buffalo, NY:  
44 Ellis G. Levine and AnneMarie W. Block; University of Iowa Hospitals, Iowa City, IA: Umar  
45 Farooq and Shivanand R. Patil; Dartmouth Medical School, Lebanon, NH: Konstantin H. Dragnev,  
46 Doris H. Wurster-Hill and Thuluvancheri K. Mohandas; Duke University Medical Center,  
47 Durham, NC: Jeffrey Crawford, Sandra H. Bigner, Mazin B. Qumsiyeh and Barbara K. Goodman;

48 Ft. Wayne Medical Oncology/Hematology, Ft. Wayne, IN: Sreenivasa Nattam and Patricia I.  
49 Bader; SUNY Upstate Medical University, Syracuse, NY: Stephen L. Graziano, Larry Gordon and  
50 Constance K. Stein; Weill Medical College of Cornell University, New York, NY: Scott T.  
51 Tagawa, Ram S. Verma, Prasad R.K. Koduru, Andrew J. Carroll and Susan Mathew; Christiana  
52 Care Health Services, Inc., Newark, DE: Gregory A. Masters, Digamber S. Borgaonkar, Jeanne  
53 M. Meck, and Kathleen Richkind; Western Pennsylvania Hospital, Pittsburgh, PA: Gene G. Finley  
54 and Gerard R. Diggans; University of Vermont Cancer Center, Burlington, VT: Peter A. Kaufman,  
55 Elizabeth F. Allen and Mary Tang; Rhode Island Hospital, Providence, RI: Howard P. Safran,  
56 Teresita Padre-Mendoza, Hon Fong L. Mark, Shelly L. Kerman and Aurelia Meloni-Ehrig;  
57 University of Massachusetts Medical Center, Worcester, MA: William V. Walsh, Philip L.  
58 Townes, Vikram Jaswaney, Kathleen Richkind, Patricia Miron and Michael J. Mitchell; Mount  
59 Sinai School of Medicine, New York, NY: Michael A. Schwartz and Vesna Najfeld; Eastern Maine  
60 Medical Center, Bangor, ME: Sarah J. Sinclair and Laurent J. Beauregard; University of California  
61 San Diego Moores Cancer Center, San Diego, CA: Lyudmila A. Bazhenova, Renée Bernstein and  
62 Marie L. Dell'Aquila; University of Alabama at Birmingham, Birmingham, AL: Robert Diasio and  
63 Andrew J. Carroll; Long Island Jewish Medical Center, Lake Success, NY: Jonathan E. Kolitz  
64 dman, Prasad R. K. Koduru, Ayala Aviram-Goldring and Chandrika Sreekantaiah; Walter Reed  
65 National Military Medical Center, Bethesda, MD: Karen G. Zeman, Rawatmal B. Surana,  
66 Digamber S. Borgaonkar, Karl S. Theil and Kathleen E. Richkind; Massachusetts General  
67 Hospital, Boston, MA: David Ryan, Justin Gainor, Cynthia C. Morton and Paola Dal Cin;  
68 University of Puerto Rico, San Juan, Puerto Rico: Eileen I. Pacheco, Leonard L. Atkins, Cynthia  
69 C. Morton and Paola Dal Cin; University of California at San Francisco, San Francisco, CA:  
70 Charalambos Andreadis and Kathleen E. Richkind; Virginia Commonwealth University,

71 Richmond, VA: Steven R. Grossman, Mary H. Hackney and Colleen Jackson-Cook; University of  
72 Minnesota, Minneapolis, MN: Anne H. Blaes, Diane C. Arthur and Betsy A. Hirsch; University  
73 of Illinois, Chicago, IL: John G. Quigley, Maureen M. McCorquodale, Kathleen E. Richkind and  
74 Valerie Lindgren; University of Missouri/Ellis Fischel Cancer Center, Columbia, MO: Puja Nistala  
75 and Tim Hui-Ming Huang; University of Nebraska Medical Center, Omaha, NE: Apar K. Ganti  
76 and Warren G. Sanger.

77

## 78 **TREATMENT PROTOCOLS**

79

80 Patients in this study received intensive cytarabine/daunorubicin-based therapy on one of the  
81 following Cancer and Leukemia Group B (CALGB) frontline treatment protocols: 19808<sup>1</sup>  
82 (n=295), 10503<sup>2</sup> (n=257), 9621<sup>3</sup> (n=137), 8525<sup>4</sup> (n=35), 9222<sup>5</sup> (n=72), 10603<sup>6</sup> (n=55), 9022<sup>7</sup>  
83 (n=5), 8821<sup>8</sup> (n=6).

84

85 Patients enrolled on CALGB 19808 were randomly assigned to receive induction chemotherapy  
86 with cytarabine, daunorubicin, and etoposide with or without PSC-833 (valsopodar), a multidrug  
87 resistance protein inhibitor.<sup>1</sup> On achievement of complete remission (CR), patients were assigned  
88 to intensification with high-dose cytarabine and etoposide for stem-cell mobilization followed by  
89 myeloablative treatment with busulfan and etoposide supported by autologous peripheral blood  
90 stem-cell transplantation (HSCT). Patients enrolled on CALGB 10503 were assigned to receive  
91 induction chemotherapy consisting of cytarabine, daunorubicin, and etoposide. Upon  
92 achievement of CR, patients received high-dose cytarabine and etoposide for stem-cell  
93 mobilization followed by myeloablative treatment with busulfan and etoposide supported by  
94 autologous peripheral HSCT. Patients not eligible for HSCT received high-dose cytarabine

95 (HiDAC). After intensification, patients received the DNA methyltransferase inhibitor decitabine  
96 for maintenance.<sup>2</sup> Patients enrolled on CALGB 9621 were treated similarly to those on CALGB  
97 19808, as previously reported.<sup>3</sup> Patients on CALGB 8525 were treated with induction  
98 chemotherapy consisting of cytarabine in combination with daunorubicin and were randomly  
99 assigned to consolidation with different doses of cytarabine followed by maintenance treatment.<sup>4</sup>  
100 Patients on protocol CALGB 9222 received induction chemotherapy consisting of cytarabine in  
101 combination with daunorubicin followed by consolidation with one cycle of HiDAC. Different  
102 doses of mitoxantrone were explored, and the consolidation treatment was randomized to three  
103 cycles of monotherapy with HiDAC or consolidation with one cycle of HiDAC, a cycle of  
104 cyclophosphamide and etoposide, and one cycle of mitoxantrone and diaziquone.<sup>5</sup> In CALGB  
105 10603, cytarabine and daunorubicin followed by consolidation with high-dose cytarabine was  
106 applied with or without PKC-412.<sup>6</sup> Patients enrolled onto CALGB 9022 received induction  
107 chemotherapy consisting of cytarabine in combination with daunorubicin followed by  
108 consolidation with one cycle of HiDAC, a cycle of cyclophosphamide and etoposide, and one cycle  
109 of mitoxantrone and diaziquone.<sup>7</sup> After induction consisting of cytarabine in combination with  
110 daunorubicin, the patients enrolled on CALGB 8821 received intensive post remission therapy  
111 with cytoxan/etoposide and diazaquone/mitoxantrone.<sup>8</sup>

112

### 113 **DEFINITION OF CLINICAL ENDPOINTS**

114

115 CR required an absolute neutrophil count  $\geq 1.5 \times 10^9/l$  with the exception for protocols CALGB  
116 10503 and 10603, which required an absolute neutrophil count of  $\geq 1.0 \times 10^9/l$ , platelet count  $\geq 100$   
117  $\times 10^9/l$ , no leukemic blasts in the blood, bone marrow (BM) cellularity  $>20\%$  with maturation of

118 all cell lines, no Auer rods, <5% BM blast cells, and no evidence of extramedullary leukemia, all  
119 of which had persisted for at least one month. Relapse was defined by  $\geq 5\%$  BM blasts, circulating  
120 leukemic blasts, or the development of extramedullary leukemia. Disease-free survival (DFS) was  
121 measured from the date of CR until the date of relapse or death; patients alive and relapse-free at  
122 last follow-up were censored. Overall survival (OS) was measured from the date on study until the  
123 date of death, and patients alive at last follow-up were censored.<sup>9</sup>

124

## 125 **MUTATIONAL PROFILING**

126

127 Cytogenetic analyses of pretreatment BM and/or blood samples subjected to short-term (24- or 48-  
128 h) unstimulated cultures were performed by CALGB/Alliance-approved institutional laboratories,  
129 and the results were confirmed by central karyotype review. Mononuclear cells were enriched  
130 through Ficoll-Hypaque gradient centrifugation and cryopreserved until use. Genomic DNA was  
131 extracted using the DNeasy Blood and Tissue Kit (QIAGEN, Hilden, Germany). The mutational  
132 status of 80 protein coding genes (*AKT1*, *ARAF*, *ASXL1*, *ATM*, *AXL*, *BCL2*, *BCOR*, *BCORL1*,  
133 *BRAF*, *BRD4*, *BRINP3*, *BTK*, *CBL*, *CCND1*, *CCND2*, *CSNK1A1*, *CTNNB1*, *DNMT3A*, *ETV6*,  
134 *EZH2*, *FBXW7*, *FLT3* [for *FLT3* tyrosine kinase domain mutations (*FLT3*-TKD)], *GATA1*,  
135 *GATA2*, *GSK3B*, *HIST1H1E*, *HNRNP3K*, *IDH1*, *IDH2*, *IKZF1*, *IKZF3*, *ILR7*, *JAK1*, *JAK2*, *JAK3*,  
136 *KIT*, *KLHL6*, *KMT2A*, *KRAS*, *MAPK1*, *MAPK3*, *MED12*, *MYD88*, *NF1*, *NOTCH1*, *NPM1*, *NRAS*,  
137 *PHF6*, *PIK3CD*, *PIK3CG*, *PLCG2*, *PLEKHG5*, *PRKCB*, *PRKD3*, *PTEN*, *PTPN11*, *RAD21*, *RAF1*,  
138 *RUNX1*, *SAMHD1*, *SETBP1*, *SF1*, *SF3A1*, *SF3B1*, *SMARCA2*, *SMC1A*, *SMC3*, *SRSF2*, *STAG2*,  
139 *SYK*, *TET2*, *TGM7*, *TP53*, *TYK2*, *U2AF1*, *U2AF2*, *WT1*, *XPO1*, *ZMYM3*, *ZRSR2*) was determined  
140 by targeted amplicon sequencing using the MiSeq platform (Illumina, San Diego, CA). DNA  
141 library preparations were performed according to the manufacturer's instructions. Briefly, samples

142 were pooled and run on the MiSeq machine using the Illumina MiSeq Reagent Kit v3. Sequenced  
143 reads were aligned to the hg19 genome build using the Illumina Isis Banded Smith-Waterman  
144 aligner. Single nucleotide variant and indel calling were performed using MuTect and VarScan,  
145 respectively.<sup>10,11</sup> The MuCor algorithm was used as the baseline for integrative mutation  
146 assessment.<sup>12</sup> We only considered non-synonymous variants not listed in either the 1000 Genome  
147 database or dbSNP142-common variants as mutations. All called variants underwent visual  
148 inspection of the aligned reads using the Integrative Genomics Viewer (Broad Institute).<sup>14</sup> All  
149 variants that occurred with variant allele fractions of <0.10 were considered wild-type; all variants  
150 that were sequenced to a depth of <15 reads were excluded from the analysis. In addition, variants  
151 were excluded when they occurred only in 1 read direction if sequenced in both directions, if the  
152 region contained many variants with low quality scores, or if they occurred in all analyzed samples  
153 including run controls. In addition, samples with high background noise were entirely excluded  
154 from analysis. Samples were considered non-evaluable for a specific gene if  $\geq 85\%$  of the  
155 amplicons covering the target regions within the coding sequence of the gene were sequenced to a  
156 depth of <15 reads.

157 Gene mutations were assigned to previously described functional groups<sup>8</sup> as follows: chromatin  
158 remodeling (*ASXL1*, *BCOR*, *BCORL1*, *EZH2* and *SMARCA2*), cohesin complex (*RAD21*, *SMC1A*,  
159 *SMC3* and *STAG2*), kinases [*AXL*, *FLT3*-ITD, *FLT3* tyrosine kinase domain mutations (*FLT3*-  
160 TKD), *KIT* and *TYK2*], methylation-related (*DNMT3A*, *IDH1/2* and *TET2*), NPM1 (*NPM1*), RAS  
161 pathway (*CBL*, *KRAS*, *NRAS* and *PTPN11*), spliceosome (*SF3B1*, *SRSF2*, *U2AF1* and *ZRSR2*),  
162 transcription factors (*CEBPA*, *ETV6*, *GATA2*, *IKZF1*, *NOTCH1* and *RUNX1*) and tumor  
163 suppressors (*PHF6*, *TP53* and *WT1*).

164

165 **STATISTICAL ANALYSES**

166 Patients enrolled into the various study protocols listed above were combined for analyses. To  
167 verify that we did not have a time-dependent bias, we compared outcomes of patients enrolled in  
168 the six protocols that comprised at least eight patients included in our study (CALGB 8525, 9222,  
169 9621, 10503, 10603 and 19808). We show that there were no statistically significant differences  
170 in CR rates ( $P=0.71$ ), DFS ( $P=0.31$ ) and OS ( $P=0.08$ ) among patients enrolled in these protocols.

171 Patients who died within 30 days after starting therapy were excluded from the study as treatment  
172 response could not be evaluated. We used a limited backwards selection technique for  
173 multivariable modeling for achievement of CR and Cox proportional hazard stepwise regression  
174 for modeling for DFS and OS. In our outcome analyses, we used  $P$ -values adjusted to control for  
175 per family error rate (probability of a Type I error) for all variables considered in univariable  
176 analyses. The families were all variables considered in each outcome analysis and only variables  
177 whose likelihood ratio test adjusted  $P$ -value was  $<0.20$  from the univariable models were  
178 considered in the multivariable analyses. To identify variables associated with achievement of CR,  
179 DFS and OS, the following parameters were included in the modeling of the outcome analyses  
180 (univariable and multivariable) for ELN 2017 Favorable-risk non-CBF-AML patients:  
181 hemoglobin, platelet counts, white blood cell (WBC) counts, % blood blasts, % BM blasts, age,  
182 race, sex, extramedullary involvement, *FLT3*-TKD and mutations in the *BCOR*, *DNMT3A*, *EZH2*,  
183 *GATA2*, *IDH1*, *IDH2*, *KIT*, *KRAS*, *NRAS*, *PLCG2*, *PTPN11*, *RAD21*, *SETBP1*, *SMARCA2*,  
184 *SMC1A*, *SMC3*, *TET2*, *WT1* and *ZRSR2* genes. To identify variables associated with achievement  
185 of CR, DFS and OS, the following parameters were included in the modeling of outcome analyses  
186 (univariable and multivariable) for ELN 2017 Favorable-risk CBF-AML patients: hemoglobin,  
187 platelet counts, WBC counts, % blood blasts, % BM blasts, age, race, sex, extramedullary



188 involvement, *FLT3*-TKD, and mutations in *KRAS*, *NRAS* and *WT1*. To identify variables  
189 associated with achievement of CR, DFS and OS, the following parameters were included in the  
190 modeling for outcome analyses (univariable and multivariable) for ELN 2017 Intermediate-risk  
191 patients: hemoglobin, platelet counts, WBC counts, % blood blasts, % BM blasts, age, race, sex,  
192 extramedullary involvement, *FLT3*-TKD, and mutations in *DNMT3A*, *IDH1*, *IDH2*, *JAK1*, *KRAS*,  
193 *NRAS*, *PTPN11*, *SMC3*, *TET2*, *WT1* and *ZRSR2*. To identify variables associated with achievement  
194 of CR, DFS and OS, the following parameters were included in the modeling for outcome analyses  
195 (univariable and multivariable) for ELN 2017 Adverse-risk patients: hemoglobin, platelet counts,  
196 WBC counts, % blood blasts, % BM blasts, age, race, sex, extramedullary involvement, *FLT3*-  
197 TKD, and mutations in *BCOR*, *DNMT3A*, *GATA2*, *IDH1*, *IDH2*, *KRAS*, *NRAS*, *PHF6*, *PLCG2*,  
198 *PTPN11*, *SF3B1*, *SMARCA2*, *SMC1A*, *SRSF2*, *STAG2*, *TET2*, *WT1* and *ZRSR2*.

199

## 200 **Supplementary references**

201

- 202 1. Kolitz JE, George SL, Marcucci G, Vij R, Powell BL, Allen SL *et al*. P-glycoprotein  
203 inhibition using valspodar (PSC-833) does not improve outcomes for patients under age 60  
204 years with newly diagnosed acute myeloid leukemia: Cancer and Leukemia Group B study  
205 19808. *Blood* 2010; **116**: 1413-1421.
- 206 2. Blum W, Sanford BL, Klisovic R, DeAngelo DJ, Uy G, Powell BL *et al*. Maintenance  
207 therapy with decitabine in younger adults with acute myeloid leukemia in first remission:  
208 A phase 2 Cancer and Leukemia Group B study (CALGB 10503). *Leukemia* 2017; **31**: 34-  
209 39.

- 210 3. Kolitz JE, George SL, Dodge RK, Hurd DD, Powell BL, Allen SL *et al.* Dose escalation  
211 studies of cytarabine, daunorubicin, and etoposide with and without multidrug resistance  
212 modulation with PSC-833 in untreated adults with acute myeloid leukemia younger than  
213 60 years: final induction results of Cancer and Leukemia Group B study 9621. *J Clin Oncol*  
214 2004; **22**: 4290-4301.
- 215 4. Mayer RJ, Davis RB, Schiffer CA, Berg DT, Powell BL, Schulman P *et al.* Intensive  
216 postremission chemotherapy in adults with acute myeloid leukemia. *N Engl J Med* 1994;  
217 **331**: 896-903.
- 218 5. Moore JO, George SL, Dodge RK, Amrein PC, Powell BL, Kolitz JE *et al.* Sequential  
219 multiagent chemotherapy is not superior to high-dose cytarabine alone as postremission  
220 intensification therapy for acute myeloid leukemia in adults under 60 years of age: Cancer  
221 and Leukemia Group B study 9222. *Blood* 2005; **105**: 3420-3427.
- 222 6. Stone RM, Mandrekar SJ, Sanford BL, Laumann K, Geyer S, Bloomfield CD *et al.*  
223 Midostaurin plus chemotherapy for acute myeloid leukemia with a FLT3 mutation. *N Engl*  
224 *J Med* 2017; **377**: 454-464.
- 225 7. Moore JO, Dodge RK, Amrein PC, Kolitz J, Lee EJ, Powell B *et al.* Granulocyte-colony  
226 stimulating factor (filgrastim) accelerates granulocyte recovery after intensive  
227 postremission chemotherapy for acute myeloid leukemia with aziridiny benzoquinone and  
228 mitoxantrone: Cancer and Leukemia Group B study 9022. *Blood* 1997; **89**: 780-788.
- 229 8. Schiffer CA, Davis RB, Schulman P, Cooper B, Coyle T, Lee E *et al.* Intensive post  
230 remission therapy of acute myeloid leukemia (AML) with cytoxan/etoposide (CY/VP16)  
231 and diazaquone/mitoxantrone (AZQ/MITO). *Blood* 1991; **78**(suppl): 460 (abstract 1829).

- 232 9. Cheson BD, Cassileth PA, Head DR, Schiffer CA, Bennett JM, Bloomfield CD *et al.*  
233 Report of the National Cancer Institute-sponsored workshop on definitions of diagnosis  
234 and response in acute myeloid leukemia. *J Clin Oncol* 1990; **8**: 813-819.
- 235 10. Cibulskis K, Lawrence MS, Carter SL, Sivachenko A, Jaffe D, Sougnez C *et al.* Sensitive  
236 detection of somatic point mutations in impure and heterogeneous cancer samples. *Nat*  
237 *Biotechnol* 2013; **31**: 213-219.
- 238 11. DePristo MA, Banks E, Poplin R, Garimella KV, Maguire JR, Hartl C *et al.* A framework  
239 for variation discovery and genotyping using next-generation DNA sequencing data. *Nat*  
240 *Genet* 2011; **43**: 491-498.
- 241 12. Kroll KW, Eisfeld A-K, Lozanski A, Bloomfield CD, Byrd JC, Blachly JS. MuCor:  
242 mutation aggregation and correlation. *Bioinformatics* 2016; **32**: 1557-1558.
- 243 13. Robinson JT, Thorvaldsdóttir H, Winckler W, Guttman M, Lander ES, Getz G *et al.*  
244 Integrative genomics viewer. *Nat Biotechnol* 2011; **29**: 24-26.
- 245 14. Marcucci G, Maharry K, Radmacher MD, Mrózek K, Vukosavljevic T, Paschka P *et al.*  
246 Prognostic significance of, and gene and microRNA expression signatures associated with,  
247 *CEBPA* mutations in cytogenetically normal acute myeloid leukemia with high-risk  
248 molecular features: A Cancer and Leukemia Group B study. *J Clin Oncol* 2008; **26**: 5078-  
249 5087.
- 250 15. Cancer Genome Atlas Research Network. Genomic and epigenomic landscapes of adult de  
251 novo myeloid leukemia. *N Engl J Med* 2013; **368**: 2059-2074.

252

253

254

255 **Supplementary Table S1.** Frequencies of gene mutations in younger adult patients with *de novo*  
 256 acute myeloid leukemia assigned to the genetic-risk groups according to the 2017 ELN  
 257 classification

| Gene <sup>a</sup>       | All patients<br>n=863 | Favorable-risk<br>n=423 | Intermediate-risk<br>n=189 | Adverse-risk<br>n=251 | P-value <sup>b</sup> |
|-------------------------|-----------------------|-------------------------|----------------------------|-----------------------|----------------------|
| <i>ASXL1</i> , n (%)    |                       |                         |                            |                       | <0.001               |
| Mutated                 | 34 (4)                | 2 (0)                   | 0 (0)                      | 32 (13)               |                      |
| Wild-type               | 829 (96)              | 421 (100)               | 189 (100)                  | 219 (87)              |                      |
| <i>AXL</i> , n (%)      |                       |                         |                            |                       | 0.72                 |
| Mutated                 | 16 (2)                | 9 (2)                   | 4 (2)                      | 3 (1)                 |                      |
| Wild-type               | 847 (98)              | 414 (98)                | 185 (98)                   | 248 (99)              |                      |
| <i>BCOR</i> , n (%)     |                       |                         |                            |                       | <0.001               |
| Mutated                 | 40 (5)                | 9 (2)                   | 8 (4)                      | 23 (9)                |                      |
| Wild-type               | 823 (95)              | 414 (98)                | 181 (96)                   | 228 (91)              |                      |
| <i>BCORL1</i> , n (%)   |                       |                         |                            |                       | 0.66                 |
| Mutated                 | 22 (3)                | 9 (2)                   | 6 (3)                      | 7 (3)                 |                      |
| Wild-type               | 841 (97)              | 414 (98)                | 183 (97)                   | 244 (97)              |                      |
| <i>BRINP3</i> , n (%)   |                       |                         |                            |                       | 0.14                 |
| Mutated                 | 14 (2)                | 4 (1)                   | 6 (3)                      | 4 (2)                 |                      |
| Wild-type               | 849 (98)              | 419 (99)                | 183 (97)                   | 247 (98)              |                      |
| <i>CBL</i> , n (%)      |                       |                         |                            |                       | 0.90                 |
| Mutated                 | 16 (2)                | 9 (2)                   | 3 (2)                      | 4 (2)                 |                      |
| Wild-type               | 847 (98)              | 414 (98)                | 186 (98)                   | 247 (98)              |                      |
| <i>CCND2</i> , n (%)    |                       |                         |                            |                       | 0.004                |
| Mutated                 | 13 (2)                | 12 (3)                  | 1 (1)                      | 0 (0)                 |                      |
| Wild-type               | 850 (98)              | 411 (97)                | 188 (99)                   | 251 (100)             |                      |
| <i>CEBPA</i> , n (%)    |                       |                         |                            |                       | <0.001               |
| Mutated                 | 73 (9)                | 73 (19)                 | 0 (0)                      | 0 (0)                 |                      |
| Wild-type               | 723 (91)              | 321 (81)                | 184 (100)                  | 218 (100)             |                      |
| <i>DNMT3A</i> , n (%)   |                       |                         |                            |                       | <0.001               |
| Mutated                 | 199 (23)              | 101 (24)                | 63 (33)                    | 35 (14)               |                      |
| R882                    | 139                   | 70                      | 44                         | 25                    |                      |
| Non-R882                | 61                    | 32                      | 19                         | 10                    |                      |
| Wild-type               | 664 (77)              | 322 (76)                | 126 (67)                   | 216 (86)              |                      |
| <i>ETV6</i> , n (%)     |                       |                         |                            |                       | 0.61                 |
| Mutated                 | 18 (2)                | 7 (2)                   | 4 (2)                      | 7 (3)                 |                      |
| Wild-type               | 845 (98)              | 416 (98)                | 185 (98)                   | 244 (97)              |                      |
| <i>EZH2</i> , n (%)     |                       |                         |                            |                       | 0.88                 |
| Mutated                 | 22 (3)                | 12 (3)                  | 4 (2)                      | 6 (2)                 |                      |
| Wild-type               | 841 (97)              | 411 (97)                | 185 (98)                   | 245 (98)              |                      |
| <i>FLT3-ITD</i> , n (%) |                       |                         |                            |                       | <0.001               |
| Present                 | 191 (23)              | 40 (10)                 | 89 (47)                    | 62 (28)               |                      |
| Absent                  | 637 (77)              | 377 (90)                | 100 (53)                   | 160 (72)              |                      |
| <i>FLT3-TKD</i> , n (%) |                       |                         |                            |                       | <0.001               |
| Present                 | 72 (8)                | 52 (12)                 | 12 (6)                     | 8 (3)                 |                      |
| Absent                  | 784 (92)              | 369 (88)                | 175 (94)                   | 240 (97)              |                      |
| <i>GATA2</i> , n (%)    |                       |                         |                            |                       | 0.13                 |
| Mutated                 | 49 (6)                | 31 (7)                  | 7 (4)                      | 11 (4)                |                      |
| Wild-type               | 814 (94)              | 392 (93)                | 182 (96)                   | 240 (96)              |                      |

| Gene <sup>a</sup>      | All patients<br>n=863 | Favorable-risk<br>n=423 | Intermediate-risk<br>n=189 | Adverse-risk<br>n=251 | P-value <sup>b</sup> |
|------------------------|-----------------------|-------------------------|----------------------------|-----------------------|----------------------|
| <i>IDH1</i> , n (%)    |                       |                         |                            |                       | 0.04                 |
| Mutated                | 63 (7)                | 40 (9)                  | 12 (6)                     | 11 (4)                |                      |
| Wild-type              | 800 (93)              | 383 (91)                | 177 (94)                   | 240 (96)              |                      |
| <i>IDH2</i> , n (%)    |                       |                         |                            |                       | 0.03                 |
| Mutated                | 74 (9)                | 27 (6)                  | 24 (13)                    | 23 (9)                |                      |
| Wild-type              | 789 (91)              | 396 (94)                | 165 (87)                   | 228 (91)              |                      |
| <i>IKZF1</i> , n (%)   |                       |                         |                            |                       | 0.02                 |
| Mutated                | 13 (2)                | 2 (0)                   | 6 (3)                      | 5 (2)                 |                      |
| Wild-type              | 850 (98)              | 421 (100)               | 183 (97)                   | 246 (98)              |                      |
| <i>JAK1</i> , n (%)    |                       |                         |                            |                       | 0.04                 |
| Mutated                | 9 (1)                 | 8 (2)                   | 1 (1)                      | 0 (0)                 |                      |
| Wild-type              | 854 (99)              | 415 (98)                | 188 (99)                   | 251 (100)             |                      |
| <i>KIT</i> , n (%)     |                       |                         |                            |                       | <0.001               |
| Mutated                | 44 (5)                | 36 (9)                  | 3 (2)                      | 5 (2)                 |                      |
| Wild-type              | 796 (95)              | 381 (91)                | 179 (98)                   | 236 (98)              |                      |
| <i>KMT2A</i> , n (%)   |                       |                         |                            |                       | 0.19                 |
| Mutated                | 14 (2)                | 4 (1)                   | 3 (2)                      | 7 (3)                 |                      |
| Wild-type              | 849 (98)              | 419 (99)                | 186 (98)                   | 244 (97)              |                      |
| <i>KRAS</i> , n (%)    |                       |                         |                            |                       | 0.47                 |
| Mutated                | 38 (4)                | 18 (4)                  | 6 (3)                      | 14 (6)                |                      |
| Wild-type              | 825 (96)              | 405 (96)                | 183 (97)                   | 237 (94)              |                      |
| <i>MED12</i> , no. (%) |                       |                         |                            |                       | 0.53                 |
| Mutated                | 11 (1)                | 4 (1)                   | 2 (1)                      | 5 (2)                 |                      |
| Wild-type              | 852 (99)              | 419 (99)                | 187 (99)                   | 246 (98)              |                      |
| <i>NFI</i> , no. (%)   |                       |                         |                            |                       | 0.54                 |
| Mutated                | 32 (6)                | 15 (5)                  | 7 (5)                      | 10 (7)                |                      |
| Wild-type              | 539 (94)              | 292 (95)                | 122 (95)                   | 125 (93)              |                      |
| <i>NOTCH1</i> , n (%)  |                       |                         |                            |                       | 0.53                 |
| Mutated                | 14 (2)                | 5 (1)                   | 3 (2)                      | 6 (2)                 |                      |
| Wild-type              | 849 (98)              | 418 (99)                | 186 (98)                   | 245 (98)              |                      |
| <i>NPM1</i> , n (%)    |                       |                         |                            |                       | <0.001               |
| Mutated                | 299 (35)              | 216 (51)                | 79 (42)                    | 4 (2)                 |                      |
| Wild-type              | 561 (65)              | 207 (49)                | 110 (58)                   | 244 (98)              |                      |
| <i>NRAS</i> , n (%)    |                       |                         |                            |                       | <0.001               |
| Mutated                | 131 (15)              | 86 (20)                 | 17 (9)                     | 28 (11)               |                      |
| Wild-type              | 732 (85)              | 337 (80)                | 172 (91)                   | 223 (89)              |                      |
| <i>PHF6</i> , n (%)    |                       |                         |                            |                       | 0.001                |
| Mutated                | 21 (2)                | 4 (1)                   | 3 (2)                      | 14 (6)                |                      |
| Wild-type              | 842 (98)              | 419 (99)                | 186 (98)                   | 237 (94)              |                      |
| <i>PIK3CG</i> , n (%)  |                       |                         |                            |                       | 0.57                 |
| Mutated                | 11 (1)                | 7 (2)                   | 1 (1)                      | 3 (1)                 |                      |
| Wild-type              | 852 (99)              | 416 (98)                | 188 (99)                   | 248 (99)              |                      |
| <i>PLCG2</i> , n (%)   |                       |                         |                            |                       | 0.78                 |
| Mutated                | 22 (3)                | 10 (2)                  | 4 (2)                      | 8 (3)                 |                      |
| Wild-type              | 841 (97)              | 413 (98)                | 185 (98)                   | 243 (97)              |                      |
| <i>PTPN11</i> , n (%)  |                       |                         |                            |                       | 0.07                 |
| Mutated                | 68 (8)                | 42 (10)                 | 9 (5)                      | 17 (7)                |                      |
| Wild-type              | 795 (92)              | 381 (90)                | 180 (95)                   | 234 (93)              |                      |

| Gene <sup>a</sup>         | All patients<br>n=863 | Favorable-risk<br>n=423 | Intermediate-risk<br>n=189 | Adverse-risk<br>n=251 | P-value <sup>b</sup> |
|---------------------------|-----------------------|-------------------------|----------------------------|-----------------------|----------------------|
| <i>RAD21</i> , n (%)      |                       |                         |                            |                       | 0.03                 |
| Mutated                   | 19 (2)                | 11 (3)                  | 7 (4)                      | 1 (0)                 |                      |
| Wild-type                 | 844 (98)              | 412 (97)                | 182 (96)                   | 250 (100)             |                      |
| <i>RUNX1</i> , n (%)      |                       |                         |                            |                       | <0.001               |
| Mutated                   | 61 (7)                | 2 (0)                   | 1 (1)                      | 58 (23)               |                      |
| Wild-type                 | 802 (93)              | 421 (100)               | 188 (99)                   | 193 (77)              |                      |
| <i>SETBP1</i> , n (%)     |                       |                         |                            |                       | 0.96                 |
| Mutated                   | 23 (3)                | 12 (3)                  | 5 (3)                      | 6 (2)                 |                      |
| Wild-type                 | 840 (97)              | 411 (97)                | 184 (97)                   | 245 (98)              |                      |
| <i>SF3B1</i> , n (%)      |                       |                         |                            |                       | 0.009                |
| Mutated                   | 26 (3)                | 8 (2)                   | 3 (2)                      | 15 (6)                |                      |
| Wild-type                 | 837 (97)              | 415 (98)                | 186 (98)                   | 236 (94)              |                      |
| <i>SMARCA2</i> , n (%)    |                       |                         |                            |                       | 0.12                 |
| Mutated                   | 26 (3)                | 13 (3)                  | 2 (1)                      | 11 (4)                |                      |
| Wild-type                 | 837 (97)              | 410 (97)                | 187 (99)                   | 240 (96)              |                      |
| <i>SMC1A</i> , n (%)      |                       |                         |                            |                       | 0.36                 |
| Mutated                   | 34 (4)                | 21 (5)                  | 5 (3)                      | 8 (3)                 |                      |
| Wild-type                 | 829 (96)              | 402 (95)                | 184 (97)                   | 243 (97)              |                      |
| <i>SMC3</i> , n (%)       |                       |                         |                            |                       | 0.17                 |
| Mutated                   | 30 (3)                | 15 (4)                  | 10 (5)                     | 5 (2)                 |                      |
| Wild-type                 | 833 (97)              | 408 (96)                | 179 (95)                   | 246 (98)              |                      |
| <i>SRSF2</i> , n (%)      |                       |                         |                            |                       | <0.001               |
| Mutated                   | 23 (3)                | 4 (1)                   | 3 (2)                      | 16 (6)                |                      |
| Wild-type                 | 836 (97)              | 417 (99)                | 185 (98)                   | 234 (94)              |                      |
| <i>STAG2</i> , n (%)      |                       |                         |                            |                       | 0.11                 |
| Mutated                   | 17 (2)                | 5 (1)                   | 3 (2)                      | 9 (4)                 |                      |
| Wild-type                 | 846 (98)              | 418 (99)                | 186 (98)                   | 242 (96)              |                      |
| <i>TET2</i> , n (%)       |                       |                         |                            |                       | 0.42                 |
| Mutated                   | 79 (9)                | 43 (10)                 | 18 (10)                    | 18 (7)                |                      |
| Wild-type                 | 784 (91)              | 380 (90)                | 171 (90)                   | 233 (93)              |                      |
| <i>TP53</i> , n (%)       |                       |                         |                            |                       | <0.001               |
| Mutated                   | 42 (5)                | 2 (0)                   | 1 (1)                      | 39 (16)               |                      |
| Wild-type                 | 821 (95)              | 421 (100)               | 188 (99)                   | 212 (84)              |                      |
| <i>TYK2</i> , n (%)       |                       |                         |                            |                       | 0.85                 |
| Mutated                   | 16 (2)                | 7 (2)                   | 4 (2)                      | 5 (2)                 |                      |
| Wild-type                 | 847 (98)              | 416 (98)                | 185 (98)                   | 246 (98)              |                      |
| <i>U2AF1</i> , n (%)      |                       |                         |                            |                       | 0.29                 |
| Mutated                   | 18 (2)                | 6 (1)                   | 6 (3)                      | 6 (2)                 |                      |
| Wild-type                 | 845 (98)              | 417 (99)                | 183 (97)                   | 245 (98)              |                      |
| <i>WT1</i> , n (%)        |                       |                         |                            |                       | 0.18                 |
| Mutated                   | 77 (9)                | 36 (9)                  | 23 (12)                    | 18 (7)                |                      |
| Wild-type                 | 786 (91)              | 387 (91)                | 166 (88)                   | 233 (93)              |                      |
| <i>ZRSR2</i> , n (%)      |                       |                         |                            |                       | 0.49                 |
| Mutated                   | 44 (5)                | 18 (4)                  | 12 (6)                     | 14 (6)                |                      |
| Wild-type                 | 819 (95)              | 405 (96)                | 177 (94)                   | 237 (94)              |                      |
| Total number of mutations |                       |                         |                            |                       | 0.10                 |

| Gene <sup>a</sup> | All patients<br>n=863 | Favorable-risk<br>n=423 | Intermediate-risk<br>n=189 | Adverse-risk<br>n=251 | P-value <sup>b</sup> |
|-------------------|-----------------------|-------------------------|----------------------------|-----------------------|----------------------|
| Median            | 3                     | 3                       | 3                          | 2                     |                      |
| Range             | (0, 9)                | (0, 9)                  | (0, 9)                     | (0, 9)                |                      |

259

260 Abbreviation: ELN, European LeukemiaNet; n, number.

261 <sup>a</sup> Listed are only those genes that were found mutated in at least 2% of patients in at least one of the risk  
 262 groups. The following genes were mutated in <2%: *AKT1*, *ARAF*, *ATM*, *BRAF*, *BRD4*, *BTK*, *CCND1*,  
 263 *CTNNB1*, *FBXW7*, *GSK3B*, *HIST1H1*, *HNRNPK*, *IKZF3*, *IL7R*, *JAK2*, *JAK3*, *KLHL6*, *MAPK3*, *MYD88*,  
 264 *PIK3CD*, *PLEKHG5*, *PRKCB*, *PRKD3*, *PTEN*, *RAF1*, *SAMHD1*, *SF1*, *SF3A1*, *SYK*, *TGM7* and *XPO1*. No  
 265 patient harbored a mutation in any of the following genes analyzed: *BCL2*, *CSNKN1A*, *GATA1*, *MAPK1*,  
 266 *U2AF2*, or *ZMYM3*.

267 <sup>b</sup> P-values for categorical variables are from Fisher's exact test. P-values for continuous variables are from  
 268 the Wilcoxon rank sum test and they are comparing the three risk groups: Favorable, Intermediate and  
 269 Adverse.

270

271

272

273 **Supplementary Table S2.** Frequencies of gene mutations assigned to functional groups in younger  
 274 adult patients with *de novo* acute myeloid leukemia assigned to the genetic-risk groups according  
 275 to the 2017 ELN classification  
 276  
 277

| Functional groups <sup>a</sup> | All patients<br>n=863 | Favorable-risk<br>n=423 | Intermediate-risk<br>n=189 | Adverse-risk<br>n=251 | P-value <sup>b</sup> |
|--------------------------------|-----------------------|-------------------------|----------------------------|-----------------------|----------------------|
| Chromatin remodeling, n (%)    |                       |                         |                            |                       | <0.001               |
| Mutated                        | 132 (15)              | 44 (10)                 | 17 (9)                     | 71 (28)               |                      |
| Wild-type                      | 731 (85)              | 379 (90)                | 172 (91)                   | 180 (72)              |                      |
| Cohesin complex, n (%)         |                       |                         |                            |                       | 0.36                 |
| Mutated                        | 99 (11)               | 51 (12)                 | 25 (13)                    | 23 (9)                |                      |
| Wild-type                      | 764 (89)              | 372 (88)                | 164 (87)                   | 228 (91)              |                      |
| Kinases, n (%)                 |                       |                         |                            |                       | <0.001               |
| Mutated                        | 316 (39)              | 137 (33)                | 102 (56)                   | 77 (35)               |                      |
| Wild-type                      | 497 (61)              | 273 (67)                | 79 (44)                    | 145 (65)              |                      |
| Methylation-related, n (%)     |                       |                         |                            |                       | <0.001               |
| Mutated                        | 328 (38)              | 165 (39)                | 96 (51)                    | 67 (27)               |                      |
| Wild-type                      | 535 (62)              | 258 (61)                | 93 (49)                    | 184 (73)              |                      |
| <i>NPM1</i> , n (%)            |                       |                         |                            |                       | <0.001               |
| Mutated                        | 298 (35)              | 216 (51)                | 78 (41)                    | 4 (2)                 |                      |
| Wild-type                      | 562 (65)              | 207 (49)                | 111 (59)                   | 244 (98)              |                      |
| <i>RAS</i> Pathway, n (%)      |                       |                         |                            |                       | <0.001               |
| Mutated                        | 242 (28)              | 148 (35)                | 35 (19)                    | 59 (24)               |                      |
| Wild-type                      | 621 (72)              | 275 (65)                | 154 (81)                   | 192 (76)              |                      |
| Spliceosome, n (%)             |                       |                         |                            |                       | <0.001               |
| Mutated                        | 104 (12)              | 34 (8)                  | 21 (11)                    | 49 (20)               |                      |
| Wild-type                      | 755 (88)              | 387 (92)                | 167 (89)                   | 201 (80)              |                      |
| Transcription factors, n (%)   |                       |                         |                            |                       | <0.001               |
| Mutated                        | 190 (24)              | 92 (23)                 | 17 (9)                     | 81 (36)               |                      |
| Wild-type                      | 612 (76)              | 302 (77)                | 167 (91)                   | 143 (64)              |                      |
| Tumor suppressor, n (%)        |                       |                         |                            |                       | <0.001               |
| Mutated                        | 135 (16)              | 41 (10)                 | 26 (14)                    | 68 (27)               |                      |
| Wild-type                      | 728 (84)              | 382 (90)                | 163 (86)                   | 183 (73)              |                      |

278

279 Abbreviations: ELN, European LeukemiaNet; n, number.

280 <sup>a</sup> Gene mutations were assigned to functional groups as follows: chromatin remodeling (*ASX1*, *BCOR*,  
 281 *BCORL1*, *EZH2* and *SMARCA2*), cohesin complex (*RAD21*, *SMC1A*, *SMC3* and *STAG2*), kinases [*AXL*,  
 282 *FLT3* internal tandem duplications (*FLT3-ITD*), *FLT3* tyrosine kinase domain mutations (*FLT3-TKD*), *KIT*  
 283 and *TYK2*], methylation-related (*DNMT3A*, *IDH1/2* and *TET2*), *NPM1* (*NPM1*), *RAS* pathway (*CBL*,  
 284 *KRAS*, *NRAS* and *PTPN11*), spliceosome (*SF3B1*, *SRSF2*, *U2AF1* and *ZRSR2*), transcription factors  
 285 (*CEBPA*, *ETV6*, *GATA2*, *IKZF1*, *NOTCH1* and *RUNX1*) and tumor suppressors (*PHF6*, *TP53* and *WT1*).

286 <sup>b</sup> P-values for categorical variables are from Fisher's exact test and they are comparing the three risk groups:  
 287 Favorable, Intermediate and Adverse.

288

289



290 **Supplementary Table S3.** Clinical outcome of younger adult patients with *de novo* acute  
 291 myeloid leukemia classified according to the proposed refinements of the 2017 ELN risk  
 292 classification with additional gene mutations  
 293

| Outcome                            | New Favorable-<br>risk<br>n=371 | New Intermediate-<br>risk<br>n=131 | New Adverse-<br>risk<br>n=361 | <i>P</i> -value <sup>a</sup> |
|------------------------------------|---------------------------------|------------------------------------|-------------------------------|------------------------------|
| Complete remission, n (%)          | 348 (92)                        | 95 (77)                            | 212 (59)                      | <0.001                       |
| Disease-free survival              |                                 |                                    |                               | <0.001                       |
| Median, years                      | 7.7                             | 1.1                                | 0.7                           |                              |
| % Disease-free at 3 years (95% CI) | 57 (51-62)                      | 32 (23-41)                         | 10 (7-15)                     |                              |
| Overall survival                   |                                 |                                    |                               | <0.001                       |
| Median, years                      | 12.9                            | 1.8                                | 1.0                           |                              |
| % Alive at 3 years (95% CI)        | 69 (64-73)                      | 41 (33-49)                         | 19 (15-23)                    |                              |

294

295 Abbreviation: CI, confidence interval; ELN, European LeukemiaNet; n, number.

296

297 <sup>a</sup> *P*-values for categorical variables are from Fisher's exact test, *P*-values for the time to event variables are  
 298 from the log-rank test and they are comparing the three risk groups: New Favorable, New Intermediate and  
 New Adverse.

298
